# Supplementary material
Source: Royal Society of Chemistry journal article supplement (doi:10.1039/d5ta09091a)
Supplement: d5ta09091a1.pdf [file d5ta09091a1.pdf]

## Supplementary Data

### Multilayer (Cr/Au)<sup>n</sup>/PAA Nanoporous Membrane for Ultrafast, Selective CO<sub>2</sub> Detection at Room Temperature

Ghadah M. Al-Senani<sup>1</sup>, Mohamed Shaban<sup>2\*</sup>, Salhah D. Al-Qahtani<sup>1</sup>, Rana Saad<sup>3</sup>

Khaled Abdelkarem<sup>4</sup>

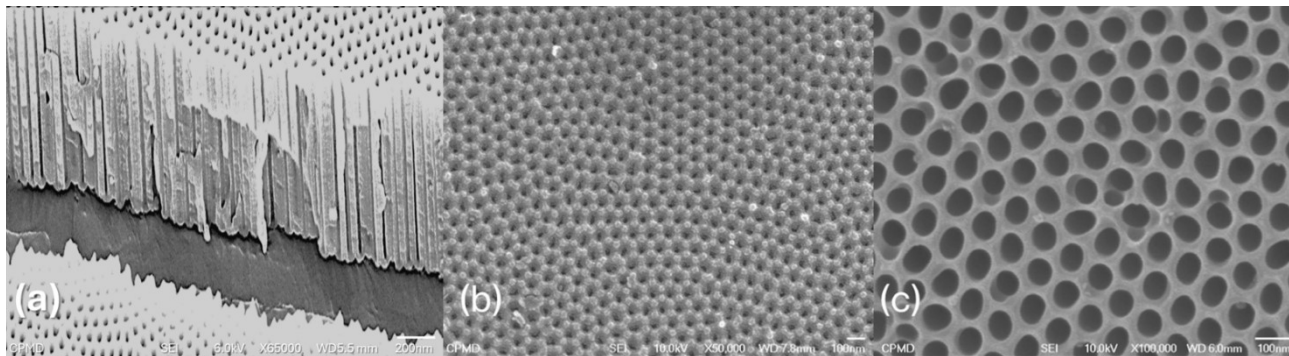

Fig. S1. SEM images of the AAO membrane showing (a) a cross-sectional view, (b) a top view of the initial structure, and (c) the membrane after undergoing 60 minutes of pore widening.

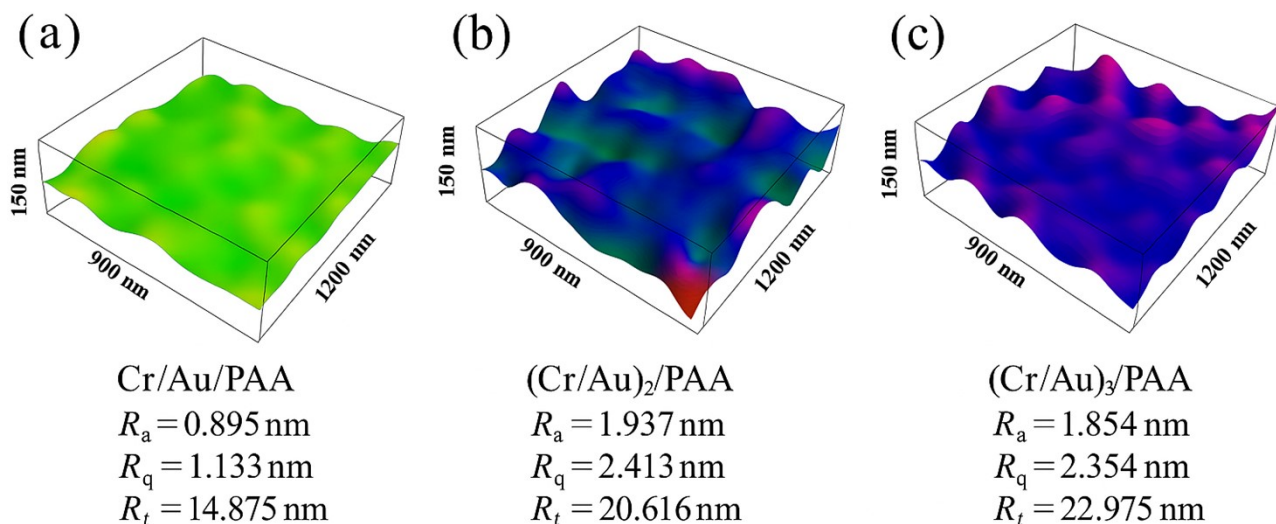

Fig. S2. 3D roughness profiles of Cr/Au-coated PAA membranes with increasing bilayer repetitions: (a) Cr/Au/PAA, (b) (Cr/Au)<sup>2</sup>/PAA, and (c) (Cr/Au)<sup>3</sup>/PAA. Surface roughness increases

with layering, enhancing active area and interface complexity—favorable traits for efficient CO<sub>2</sub> sensing.

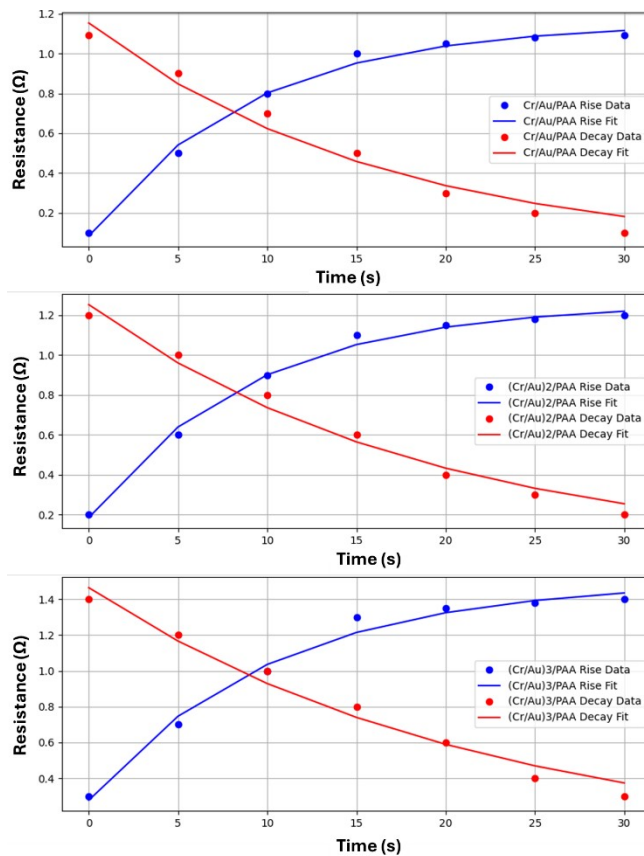

Fig. S3. Both rise and decay phases fitted with exponential models for (a)Cr/Au/PAA, (b) (Cr/Au)<sup>2</sup>/PAA, and (c) (Cr/Au)<sup>3</sup>/PAA sensors at 4440 ppm CO<sub>2</sub>.
